# Supplementary material for: Planning and implementation of a countrywide campaign to deliver over 16 million long-lasting insecticidal nets in Mozambique
Source: PubMed Central journal article supplement (PMC6038318; doi:10.1186/s12936-018-2406-2), 2018-07-09
Supplement: 12936_2018_2406_MOESM5_ESM.pdf [file 12936_2018_2406_MOESM5_ESM.pdf]

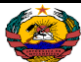

Ministério de Saúde  
Programa Nacional de Controlo da Malária  
CAMPANHA DE DISTRIBUIÇÃO DE REDES MOSQUITEIRAS PARA A COBERTURA UNIVERSAL

## Guia de Remessa

**Nr. (Pré-numeração)**

|                                  |              |
|----------------------------------|--------------|
| Provincia: _____ Distrito: _____ |              |
| Data: ____/____/____             |              |
| Enviado por: _____               | Para: _____  |
| Local: _____                     | Local: _____ |

|                           |                  |
|---------------------------|------------------|
| Tipo de transporte: _____ | Matrícula: _____ |
|---------------------------|------------------|

| Nr | Artigo | Quantidade | Unidade | Tipo de embalagem | Quantidade de embalagens |
|----|--------|------------|---------|-------------------|--------------------------|
| 1  |        |            |         |                   |                          |
| 2  |        |            |         |                   |                          |
| 3  |        |            |         |                   |                          |
| 4  |        |            |         |                   |                          |
| 5  |        |            |         |                   |                          |
| 6  |        |            |         |                   |                          |
| 7  |        |            |         |                   |                          |

**Comentários / observações** (*estado dos bens no acto de recepção: faltas / quebras, etc*)

|                      |
|----------------------|
| <br><br><br><br><br> |
|----------------------|

**Confirmação do carregamento** (*acompanhante ou motorista*)

**Recepção** (*agente responsável*)

|                                        |                                        |
|----------------------------------------|----------------------------------------|
| Nome: _____                            | Nome: _____                            |
| Assinatura: _____ Data: ____/____/____ | Assinatura: _____ Data: ____/____/____ |

Assinatura do quem envia: \_\_\_\_\_ Data: \_\_\_\_/\_\_\_\_/\_\_\_\_
