# Supplementary material for: Planning and implementation of a countrywide campaign to deliver over 16 million long-lasting insecticidal nets in Mozambique
Source: PubMed Central journal article supplement (PMC6038318; doi:10.1186/s12936-018-2406-2), 2018-07-09
Supplement: 12936_2018_2406_MOESM6_ESM.pdf [file 12936_2018_2406_MOESM6_ESM.pdf]

## Appendix 6: Operational payments plan

| Zambezia province |              | Predicted registrars | District with M-Pesa? |        | # of M-Pesa agents | Ratio registrar/M pesa agent | Good Mpesa coverage? |        | District have bank? |        | If not, which nearest district with bank? | Distance in Km/miles | Expected amount (local currency) |
|-------------------|--------------|----------------------|-----------------------|--------|--------------------|------------------------------|----------------------|--------|---------------------|--------|-------------------------------------------|----------------------|----------------------------------|
|                   | District     |                      | Yes (1)               | No (1) |                    |                              | Yes (x)              | No (x) | Yes (1)             | No (1) |                                           |                      |                                  |
| 1                 | Quelimane    | 703                  | 1                     |        | 372                | 1.9                          | x                    |        | 1                   |        |                                           |                      | 984,200                          |
| 2                 | Alto Molocué | 720                  | 1                     |        | 48                 | 15.0                         | x                    |        | 1                   |        |                                           |                      | 1,008,000                        |
| 3                 | Chinde       | 174                  |                       | 1      | 0                  | 0                            |                      | x      |                     | 1      | Mopeia                                    | 120                  | 243,600                          |
| 4                 | Derre        | 168                  |                       | 1      | 0                  | 0                            |                      | x      |                     | 1      | Morrumbala                                | 90                   | 235,200                          |
| 5                 | Gilé         | 361                  | 1                     |        | 1                  | 361.0                        |                      | x      |                     | 1      | Alto Molocue                              | 160                  | 505,400                          |
|                   |              | 2,126                | 3                     | 2      | 421                | 5.05                         |                      |        | 2                   | 3      |                                           |                      | 2,976,400                        |

### Legend

|  |                                                          |
|--|----------------------------------------------------------|
|  | Up to 15 registrars per Mpesa agent - Good ratio         |
|  | 15.1 to 45.0 registrars per Mpesa agent - Moderate ratio |
|  | 45.1 and more registrars per Mpesa agent - Bad ratio     |
|  | Without Mpesa                                            |

| Zambezia province |              | Predicted registrars | Payment plan for registrars                                                       | Remarks                                                                   | Payment plan for health staff | Remarks                                                                             |
|-------------------|--------------|----------------------|-----------------------------------------------------------------------------------|---------------------------------------------------------------------------|-------------------------------|-------------------------------------------------------------------------------------|
|                   | District     |                      |                                                                                   |                                                                           |                               |                                                                                     |
| 1                 | Quelimane    | 703                  | Good ratio. Mpesa payment for all registrars                                      | All recruited registrars should have cell phone                           | Bank transfer                 | Ensure that all health staff provides accurate bank account numbers, including IBAN |
| 2                 | Alto Molocué | 720                  | Good ratio. All registrars from district headquarter should be paid through Mpesa | All recruited registrars from district headquarter should have cell phone | Bank transfer                 | Ensure that all health staff provides accurate bank account numbers, including IBAN |
| 3                 | Chinde       | 174                  | No Mpesa agent available. Payments should be made through cash on hand            | Ensure money withdraw in Mopeia district                                  | Bank transfer                 | Ensure that all health staff provides accurate bank account numbers, including IBAN |
| 4                 | Derre        | 168                  | No Mpesa agent available. Payments should be made through cash on hand            | Ensure money withdraw in Morrumbala district                              | Bank transfer                 | Ensure that all health staff provides accurate bank account numbers, including IBAN |
| 5                 | Gilé         | 361                  | Bad ratio. Payments through cash on hand                                          | Ensure money withdraw in Molocue district                                 | Bank transfer                 | Ensure that all health staff provides accurate bank account numbers, including IBAN |
|                   |              | 2,126                |                                                                                   |                                                                           |                               |                                                                                     |
