# Supplementary material for: Planning and implementation of a countrywide campaign to deliver over 16 million long-lasting insecticidal nets in Mozambique
Source: Springer Nature journal article supplement (doi:10.1186/s12936-018-2406-2), 2018-07-09
Supplement: MOESM1 [file 15927868]

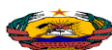

FOLHA N°: \_\_\_\_\_

**MINISTÉRIO DA SAÚDE**  
**Programa Nacional do Controlo da Malária**  
**Campanha de Distribuição de Redes Mosquiteiras para a Cobertura Universal**

**FICHA DE REGISTO DOS AGREGADOS FAMILIARES**

PROVÍNCIA..... DISTRITO.....  
 POSTO ADMINISTRATIVO..... LOCALIDADE.....  
 ALDEIA..... BAIRO.....  
 CHEFE DA COMUNIDADE ..... POSTO DE DISTRIBUIÇÃO.....  
 DATA: \_\_\_\_/\_\_\_\_/\_\_\_\_

| <b>A ser preenchido pelo Registador</b> |                                                                                   |                                                                                                            |                      |                              |             |
|-----------------------------------------|-----------------------------------------------------------------------------------|------------------------------------------------------------------------------------------------------------|----------------------|------------------------------|-------------|
| Nome do Registador: .....               |                                                                                   |                                                                                                            |                      |                              |             |
| #                                       | Nome dos membros do Agregado Familiar (o 1º nome é do chefe do agregado familiar) | Número de membros do agregado familiar que vivem no mesmo quintal (incluindo o chefe do agregado familiar) | Nº de Série da Senha | Número de redes por atribuir | Observações |
|                                         |                                                                                   |                                                                                                            |                      |                              |             |
|                                         |                                                                                   |                                                                                                            |                      |                              |             |
|                                         |                                                                                   |                                                                                                            |                      |                              |             |
|                                         |                                                                                   |                                                                                                            |                      |                              |             |
|                                         |                                                                                   |                                                                                                            |                      |                              |             |
|                                         |                                                                                   |                                                                                                            |                      |                              |             |
|                                         |                                                                                   |                                                                                                            |                      |                              |             |
|                                         |                                                                                   |                                                                                                            |                      |                              |             |
|                                         |                                                                                   |                                                                                                            |                      |                              |             |
|                                         |                                                                                   |                                                                                                            |                      |                              |             |
|                                         |                                                                                   |                                                                                                            |                      |                              |             |
|                                         |                                                                                   |                                                                                                            |                      |                              |             |
|                                         |                                                                                   |                                                                                                            |                      |                              |             |
|                                         |                                                                                   |                                                                                                            |                      |                              |             |
|                                         |                                                                                   |                                                                                                            |                      |                              |             |
|                                         |                                                                                   |                                                                                                            |                      |                              |             |
|                                         |                                                                                   |                                                                                                            |                      |                              |             |
|                                         |                                                                                   |                                                                                                            |                      |                              |             |
|                                         |                                                                                   |                                                                                                            |                      |                              |             |
|                                         |                                                                                   |                                                                                                            |                      |                              |             |
|                                         |                                                                                   |                                                                                                            |                      |                              |             |
|                                         |                                                                                   |                                                                                                            |                      |                              |             |
|                                         |                                                                                   |                                                                                                            |                      |                              |             |
|                                         |                                                                                   |                                                                                                            |                      |                              |             |
|                                         |                                                                                   |                                                                                                            |                      |                              |             |
|                                         |                                                                                   |                                                                                                            |                      |                              |             |
|                                         |                                                                                   |                                                                                                            |                      |                              |             |
|                                         |                                                                                   |                                                                                                            |                      |                              |             |
|                                         |                                                                                   |                                                                                                            |                      |                              |             |
|                                         |                                                                                   |                                                                                                            |                      |                              |             |
|                                         |                                                                                   |                                                                                                            |                      |                              |             |
| <b>TOTAL (MEMBROS/SENHAS/REDES)</b>     |                                                                                   |                                                                                                            |                      |                              |             |

Para este registo, o agregado familiar inclui todas as pessoas que vivem juntos ou dormem na mesma casa/quintal/telhão. Quando um homem tem mais de uma esposa ou mulher, cada uma delas deverá ser tratada como um agregado familiar separado.

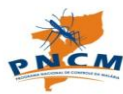

|          |                          |
|----------|--------------------------|
| Página # | Assinatura do supervisor |
|----------|--------------------------|

\_\_\_\_\_
