# Supplementary material for: Planning and implementation of a countrywide campaign to deliver over 16 million long-lasting insecticidal nets in Mozambique
Source: Springer Nature journal article supplement (doi:10.1186/s12936-018-2406-2), 2018-07-09
Supplement: MOESM2 [file 15927868]

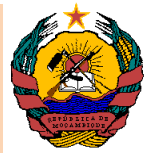

RURAL

**MINISTERIO DE SAUDE  
FICHA DE AGREGADOS FAMILIARES BENEFICIADOS**

PROVÍNCIA \_\_\_\_\_ Distrito \_\_\_\_\_ Posto Administrativo: \_\_\_\_\_

(NB: Em cada dia de distribuicao usar uma ficha nova de registo)

Localidade: \_\_\_\_\_ Povoado/Comunidade/Bairro \_\_\_\_\_

Posto de Distribuição: \_\_\_\_\_ Data \_\_\_\_ / \_\_\_\_ / \_\_\_\_

**A SER PEENCHIDO PELO RECEPTOR DE SENHAS**

| AGREGADOS FAMILIARES BENEFICIADOS                           | TOTAL |
|-------------------------------------------------------------|-------|
| 00000 00000 00000 00000 00000 00000 00000 00000 00000 00000 | 50    |
| 00000 00000 00000 00000 00000 00000 00000 00000 00000 00000 | 100   |
| 00000 00000 00000 00000 00000 00000 00000 00000 00000 00000 | 150   |
| 00000 00000 00000 00000 00000 00000 00000 00000 00000 00000 | 200   |
| 00000 00000 00000 00000 00000 00000 00000 00000 00000 00000 | 250   |
| 00000 00000 00000 00000 00000 00000 00000 00000 00000 00000 | 300   |
| 00000 00000 00000 00000 00000 00000 00000 00000 00000 00000 | 350   |
| 00000 00000 00000 00000 00000 00000 00000 00000 00000 00000 | 400   |
| 00000 00000 00000 00000 00000 00000 00000 00000 00000 00000 | 450   |
| 00000 00000 00000 00000 00000 00000 00000 00000 00000 00000 | 500   |
| 00000 00000 00000 00000 00000 00000 00000 00000 00000 00000 | 550   |
| 00000 00000 00000 00000 00000 00000 00000 00000 00000 00000 | 600   |
| 00000 00000 00000 00000 00000 00000 00000 00000 00000 00000 | 650   |
| 00000 00000 00000 00000 00000 00000 00000 00000 00000 00000 | 700   |
| 00000 00000 00000 00000 00000 00000 00000 00000 00000 00000 | 750   |
| 00000 00000 00000 00000 00000 00000 00000 00000 00000 00000 | 800   |
| 00000 00000 00000 00000 00000 00000 00000 00000 00000 00000 | 850   |
| 00000 00000 00000 00000 00000 00000 00000 00000 00000 00000 | 900   |
| 00000 00000 00000 00000 00000 00000 00000 00000 00000 00000 | 950   |
| 00000 00000 00000 00000 00000 00000 00000 00000 00000 00000 | 1,000 |
| <b>TOTAL de Agregados Familiares Beneficiados</b>           |       |

Nome do chefe da equipa do PD \_\_\_\_\_ Assinatura \_\_\_\_\_ Data \_\_\_\_ / \_\_\_\_ / \_\_\_\_

Observações:
