# Supplementary material for: Planning and implementation of a countrywide campaign to deliver over 16 million long-lasting insecticidal nets in Mozambique
Source: Springer Nature journal article supplement (doi:10.1186/s12936-018-2406-2), 2018-07-09
Supplement: MOESM3 [file 15927868]

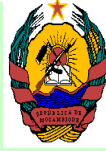

RURAL

MINISTERIO DE SAUDE
FICHA DE DISTRIBUICAO DE REDES MOSQUITEIRAS

PROVINCIA Distrito Posto Administrativo:

(NB: Em cada dia de distribuicao usar uma ficha nova de registo)

Localidade: Povoado/Comunidade/Bairro

Posto de Distribuicao: Data: / /

A SER PEENCHIDO PELO DISTRIBUIDOR

Table with columns: REDES MOSQUITEIRAS DISTRIBUÍDAS (10 columns of 00000) and TOTAL. Rows range from 50 to 1,000, plus a total row.

A: Quantidade de Redes Mosquiteiras recebida do armazém do PD no início do dia

B: Quantidade adicional de Redes Mosquiteiras recebida do armazém do PD

C: Redes Mosquiteiras distribuida hoje

D: Quantidade de Redes Mosquiteiras que sobraram no fim do dia (devolvidos ao armazém do PD)

Nome do chefe da equipa do PD Assinatura Data / /

Observações:
