# Supplementary material for: Planning and implementation of a countrywide campaign to deliver over 16 million long-lasting insecticidal nets in Mozambique
Source: Springer Nature journal article supplement (doi:10.1186/s12936-018-2406-2), 2018-07-09
Supplement: MOESM4 [file 15927868]

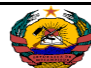

Ministério de Saúde

Programa Nacional de Controlo da Malária

CAMPANHA DE DISTRIBUIÇÃO DE REDES MOSQUITEIRAS PARA A COBERTURA UNIVERSAL

**FICHA DE STOCK DE ARMAZÉM**

Página: \_\_\_\_ / \_\_\_\_

Provincia de: \_\_\_\_\_ Distrito de: \_\_\_\_\_ Localidade de: \_\_\_\_\_

Nome do Responsável do Armazém: \_\_\_\_\_

**Nota:** use esferográficas de cores diferentes para diferenciar os movimentos de entradas e de saídas (**Vermelho** para **entradas** e **azul/preta** para **saídas**)

| Nr. | Data | Proveniência (Coluna a ser preenchida só para entradas) | Destino (coluna a ser preenchida só para saídas) | Nr. da guia de remessa | Nr. matrícula ou tipo de transporte | Quantidade de redes indicadas na guia de remessa | Quantidade de redes recebidas (Coluna a ser preenchida só para entradas) | Quantidade de redes enviadas (coluna a ser preenchida só para saídas) | Stock                |                                         |                        | Comentários / Nome e apelido |
|-----|------|---------------------------------------------------------|--------------------------------------------------|------------------------|-------------------------------------|--------------------------------------------------|--------------------------------------------------------------------------|-----------------------------------------------------------------------|----------------------|-----------------------------------------|------------------------|------------------------------|
|     |      |                                                         |                                                  |                        |                                     |                                                  |                                                                          |                                                                       | Nr. total de REMILDs | Nr. de Redes Mosquiteiras Fora do Fardo | Nr. Fardos não abertos |                              |
|     |      |                                                         |                                                  |                        |                                     |                                                  |                                                                          |                                                                       | A = B + (C X 50)     | B                                       | C                      |                              |
|     |      |                                                         |                                                  |                        |                                     |                                                  |                                                                          |                                                                       |                      |                                         |                        |                              |
|     |      |                                                         |                                                  |                        |                                     |                                                  |                                                                          |                                                                       |                      |                                         |                        |                              |
|     |      |                                                         |                                                  |                        |                                     |                                                  |                                                                          |                                                                       |                      |                                         |                        |                              |
|     |      |                                                         |                                                  |                        |                                     |                                                  |                                                                          |                                                                       |                      |                                         |                        |                              |
|     |      |                                                         |                                                  |                        |                                     |                                                  |                                                                          |                                                                       |                      |                                         |                        |                              |
|     |      |                                                         |                                                  |                        |                                     |                                                  |                                                                          |                                                                       |                      |                                         |                        |                              |
|     |      |                                                         |                                                  |                        |                                     |                                                  |                                                                          |                                                                       |                      |                                         |                        |                              |
|     |      |                                                         |                                                  |                        |                                     |                                                  |                                                                          |                                                                       |                      |                                         |                        |                              |
|     |      |                                                         |                                                  |                        |                                     |                                                  |                                                                          |                                                                       |                      |                                         |                        |                              |
|     |      |                                                         |                                                  |                        |                                     |                                                  |                                                                          |                                                                       |                      |                                         |                        |                              |
|     |      |                                                         |                                                  |                        |                                     |                                                  |                                                                          |                                                                       |                      |                                         |                        |                              |
|     |      |                                                         |                                                  |                        |                                     |                                                  |                                                                          |                                                                       |                      |                                         |                        |                              |
|     |      |                                                         |                                                  |                        |                                     |                                                  |                                                                          |                                                                       |                      |                                         |                        |                              |
|     |      |                                                         |                                                  |                        |                                     |                                                  |                                                                          |                                                                       |                      |                                         |                        |                              |
|     |      |                                                         |                                                  |                        |                                     |                                                  |                                                                          |                                                                       |                      |                                         |                        |                              |
|     |      |                                                         |                                                  |                        |                                     |                                                  |                                                                          |                                                                       |                      |                                         |                        |                              |
|     |      |                                                         |                                                  |                        |                                     |                                                  |                                                                          |                                                                       |                      |                                         |                        |                              |
|     |      |                                                         |                                                  |                        |                                     |                                                  |                                                                          |                                                                       |                      |                                         |                        |                              |
|     |      |                                                         |                                                  |                        |                                     |                                                  |                                                                          |                                                                       |                      |                                         |                        |                              |
|     |      |                                                         |                                                  |                        |                                     |                                                  |                                                                          |                                                                       |                      |                                         |                        |                              |

Total de entradas   Total de saídas  

Stock de Fardos a transitar:    
Stock de REMILDs avulsas a transitar:
